# Supplementary material for: Enhanced luminescence of delaminated layered europium hydroxide (LEuH) composites with sensitizer anions of coumarin-3-carboxylic acid
Source: Royal Society of Chemistry journal article supplement (doi:10.1039/c7dt02662e), 2017-01-01
Supplement: c7dt02662e1.pdf [file c7dt02662e1.pdf]

## Electronic Supplementary Information (ESI)

### Enhanced luminescence of delaminated layered europium hydroxide (LEuH) composites with sensitizer anions of coumarin-3-carboxylic acid

Lijiao Ma, Mengwei Yuan, Chenyu Liu, Linxia Xie, Feifei Su, Shulan Ma,\* Genban Sun, Huifeng Li

Beijing Key Laboratory of Energy Conversion and Storage Materials, College of Chemistry, Beijing

Normal University, Beijing 100875, China. Fax: 86 10 5880 2075; Tel: 86 10 5880 7524; E-mail:

[mashulan@bnu.edu.cn](mailto:mashulan@bnu.edu.cn)

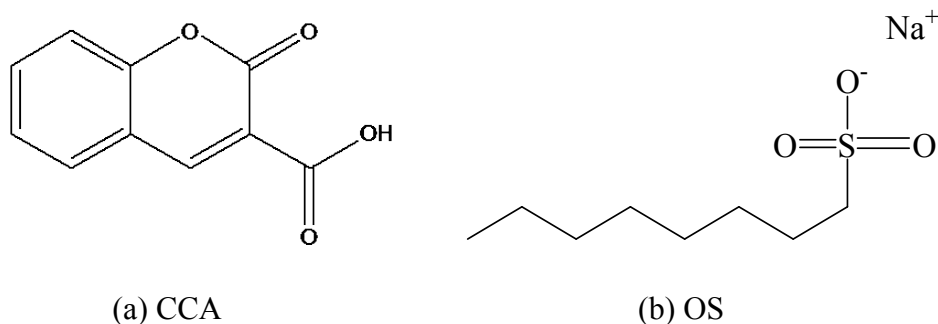

**Scheme S1.** Structures of the organic compounds of CCA and OS.

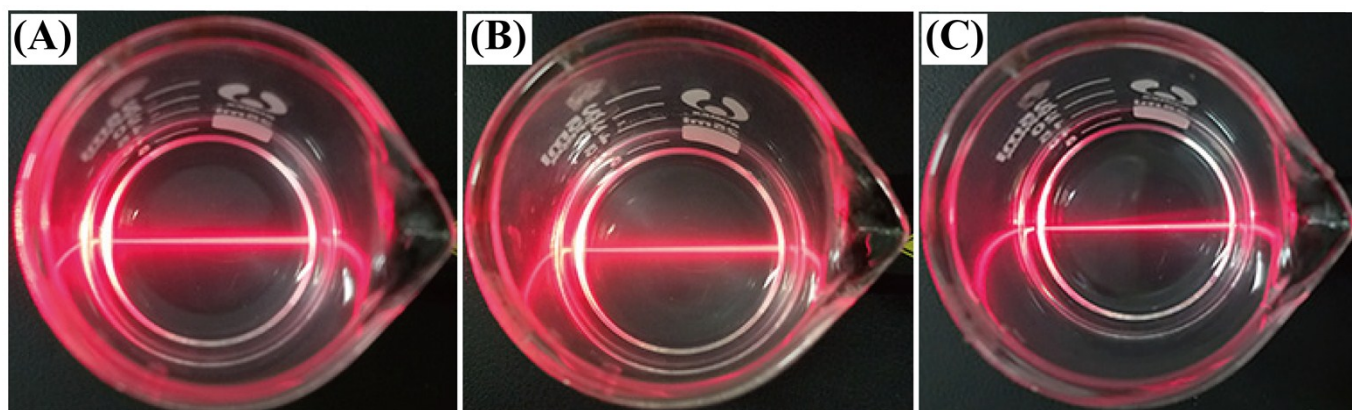

**Fig. S1** Tyndall light scattering of colloidal suspensions of (A) OS-LEuH, (B) CCA<sub>0.20</sub>OS<sub>0.80</sub>-LEuH-1:1 and (C) CCA<sub>0.02</sub>OS<sub>0.98</sub>-LEuH-1:1 in formamide.

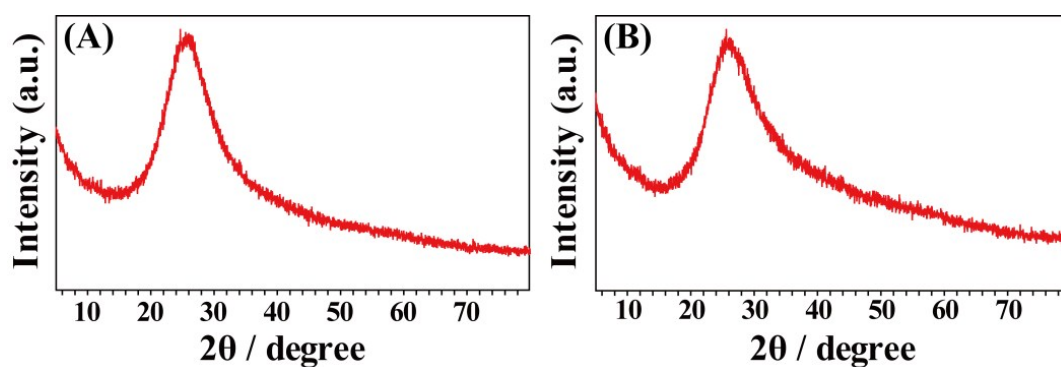

**Fig. S2** XRD patterns of the gluelike sediments after centrifuging the colloidal suspensions of the composites (A) CCA<sub>0.20</sub>OS<sub>0.80</sub>-LEuH-1:1 and (B) CCA<sub>0.02</sub>OS<sub>0.98</sub>-LEuH-1:1 in formamide, respectively.

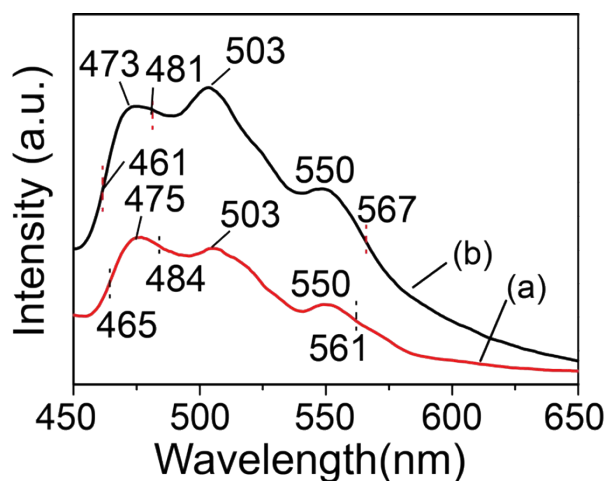

**Fig. S3** Phosphorescence spectrum of complexes of CCA-Gd (a) and CCA-2Gd (b) in methanol solutions measured at 77 K.
